1 QTL mapping of the narrow-branch “Pendula” phenotype in Norway spruce  
2 (*Picea abies* L. Karst.)

---

3  
4 Francisco Gil-Muñoz\*<sup>1</sup>, Carolina Bernhardsson\*<sup>1</sup>, Sonali Sachin Ranade<sup>1</sup>, Douglas G.  
5 Scofield<sup>2</sup>, Pertti O. Pulkkinen<sup>3</sup>, Pär K. Ingvarsson<sup>4</sup>, M. Rosario García-Gil<sup>1</sup>

6  
7 \*shared first authorship

8 1 Department of Forest Genetics and Plant Physiology, Umeå Plant Science Centre,  
9 Swedish University of Agricultural Science (SLU), 901 83 Umeå, Sweden,

10 2 Department of Ecology and Genetics, *Evolutionary Biology*, Uppsala University  
11 752 36 Uppsala, Sweden

12 3 Natural Resources Institute Finland (LUKE), 00790 Helsinki, Finland

13 4 Department of Plant Biology, Swedish University of Agricultural Sciences (SLU),  
14 756 51 Uppsala, Sweden

15 Corresponding author: [m.rosario.garcia@slu.se](mailto:m.rosario.garcia@slu.se)

16

17 **Abstract**

18 Pendula-phenotyped Norway spruce has a potential forestry interest for high density  
19 plantations. This phenotype is believed to be caused by a dominant single mutation.  
20 Despite the availability of RAPD markers linked to the trait, the nature of the mutation  
21 is yet unknown. We performed a Quantitative Trait Loci (QTL) mapping based on two  
22 different progenies of F1 crosses between pendula and normal crowned trees using  
23 NGS technologies. Approximately 25 % of all gene bearing scaffolds of *Picea abies*  
24 genome assembly v1.0 were mapped to 12 linkage groups and a single QTL, positioned

25 near the center of LG VI, was found in both crosses. The closest probe-markers placed  
26 on the maps were positioned 0.82 cM and 0.48 cM away from the Pendula marker in  
27 two independent pendula-crowned x normal-crowned wildtype crosses, respectively.  
28 We have identified genes close to the QTL region with differential mutations on coding  
29 regions and discussed their potential role in changing branch architecture.

30

31

32

### 33 **Introduction**

34 The molecular control of lateral branching involves phytohormones such as cytokinins,  
35 auxin (IAA) and strigolactones (Leyser, 2008). Even though plant architecture-related  
36 pathways are fairly well understood in model species (Jiao et al., 2021; Roychoudhry  
37 & Kepinski, 2015; Sakai & Haga, 2012; Strohm et al., 2013), the genetic regulation of  
38 branching architecture in trees, and especially in conifers, is overall poorly investigated.  
39 During the last decade, several studies have been conducted on branching mutants in  
40 different angiosperm tree species in order to identify the responsible genes underlying  
41 the branching phenotype. The *TAC1* gene is responsible for vertically oriented growth  
42 of branches and mutations in *TAC1* have been shown to result in ‘pillar’ phenotypes in  
43 Peach (*Prunus persica*) (Dardick et al., 2013), Plum (*Prunus domestica*) (Hollender,  
44 Waite, et al., 2018), *Populus × zhaiguanheibaiyang* (Xu et al., 2017) and Black  
45 cottonwood (*Populus trichocarpa*) (Fladung, 2021). Similarly, *LAZY1* has been shown  
46 to regulate the horizontal orientation of lateral shoots (Xu et al., 2017). Wider branch  
47 angles are regulated by *WEEP* gene in peach, causing a more pendulous phenotype  
48 (Hollender, Pascal, et al., 2018).

49 Trees with narrower crowns, either caused by very small or very large branch  
50 angles, can potentially be planted closer together and thereby give a possibility to utilize  
51 the planting area more efficiently. In Norway spruce (*Picea abies* L Karst.), a branching  
52 mutant entitled “Pendula” have been identified and this mutation is characterized by  
53 down-oriented lateral branches (Figure 1). Earlier studies have shown that the harvest  
54 index of Pendula individuals is higher than wild-type trees; the especially the above-  
55 ground one (Pöykkö & Pulkkinen, 1990; Pulkkinen & Poykko, 1990). They also appear  
56 to be less sensitive to tree competition than normal-crowned individuals (Gerendiain et  
57 al., 2008), which suggests that they can be planted in denser stands. This mutant also

58 appears to segregate in a 1:1 dominant segregation pattern consistent with the control  
59 of one or only a few genes (Karki & Tigerstedt, 1985; Lepistö, 1985). However, in  
60 order to utilize the Pendula mutant in practical forestry and silviculture, a method for  
61 screening the branch phenotype at an early age is necessary. This could be done with a  
62 reliable genetic marker. An earlier study aimed at identifying such a marker was  
63 conducted by Lehner et al., (1995) using random amplified polymorphic DNA (RAPD)  
64 markers to map the Pendula gene using bulked segregant analysis in 43 full-sib  
65 progenies from the cross P289 (normal crowned) x E477 (Pendula). One marker,  
66 OPH10\_720, was found to be linked to the Pendula gene with an estimated  
67 recombination frequency of 0.046 (SE = 0.032) (Lehner et al., 1995), but RAPD  
68 markers are known to have low reproducibility, making them unsuitable for large-scale  
69 screenings.

70 The advent of next-generation sequencing (NGS) technologies and the  
71 availability of a draft genome assembly for Norway spruce (Nystedt et al., 2013) have  
72 opened up possibilities to explore the genetic architecture underlying the Pendula  
73 phenotype by creating dense genetic maps and subsequent Quantitative Trait Loci  
74 (QTL) mapping of the phenotype. Here we present four genetic maps, two maternal and  
75 two paternal genetic maps, derived from QTL mapping in two independent F<sub>1</sub> crosses  
76 of a Pendula and normal crowned parent (E477 x K954 and E479 x E2089,  
77 respectively).

## 78 **Methods & Materials**

### 79 **DNA extraction and sequence capture**

80 Newly flushed buds were collected from two progeny trials of F<sub>1</sub> crosses between a  
81 Pendula and a normal crowned individual made in the 1980s [E477 (pendula) x K594

82 and E479 (pendula) x E2089] at a breeding trial run by the Natural Resources Institute  
83 Finland (LUKE, formerly METLA) in the spring/summer of 2013. At the same time,  
84 branching phenotypes were documented in all offsprings, resulting in 435 and 389  
85 collected and documented progenies for cross E477 x K594 and E479 x E2089,  
86 respectively. The samples were shipped to Umeå University, Sweden, for DNA  
87 extraction.

88 DNA extraction was performed using a Qiagen DNeasy<sup>®</sup> Plant Mini Kit with  
89 approximately 20 ng of freeze-dried tissue as starting material and using the default  
90 protocol. Each extracted sample was measured for DNA quality using a Qubit<sup>®</sup> ds  
91 DNA Broad Range (BR) Assay Kit, and all samples had DNA concentrations of  $\geq 21.4$   
92 ng/ $\mu$ l (mean 66.2 ng/ $\mu$ l) and a total amount of DNA  $\geq 2.2\mu$ g (mean 7.4  $\mu$ g). The 828  
93 samples, including samples of the four parents, were sent to RAPiD Genomics<sup>©</sup>  
94 (Gainesville, Florida, USA) in October 2014 for sequence capture using 40,018 capture  
95 probes that had been specifically designed to target 26,219 partially validated gene  
96 models from the *P. abies* genome assembly (Vidalis et al., 2018). Where possible,  
97 probes were designed to flank regions of known contig joins in the v1.0 genome  
98 assembly of *P. abies* (Nystedt et al., 2013, for further detail on the probe design, see  
99 Vidalis et al., 2018).

100 The capture data was sequenced by RAPiD Genomics<sup>©</sup> on an Illumina HiSeq  
101 2000 in either 2x125 or 2x75bp sequencing mode and was delivered in October 2015.  
102 Due to the low sequencing depth of the parental samples, these were re-sent for a second  
103 round of sequence capture to increase the genotyping call rate of the parents. The raw  
104 sequencing reads were mapped against the complete *P. abies* reference genome v.1.0  
105 using BWA-MEM v.0.7.12 (H. Li & Durbin, 2009). The two bam files for each parental  
106 sample (caused by the two rounds of sequencing) were merged using Samtools v.1.2

107 before further processing through the variant calling pipeline. Following read mapping,  
108 the BAM files were subsetted to only contain the probe-bearing scaffolds (a total of  
109 24,920 scaffolds) using Samtools v.1.2 (H. Li et al., 2009; H. Li & Durbin, 2009).  
110 Duplicates were marked and local realignment around indels was performed using  
111 Picard (<http://broadinstitute.github.io/picard/>) and GATK  
112 (<https://software.broadinstitute.org/gatk/>) (DePristo et al., 2011; McKenna et al., 2010).  
113 Genotyping was performed using GATK Haplotypecaller (version 3.4-46), (DePristo  
114 et al., 2011; Van der Auwera et al., 2013) with a diploid ploidy setting and gVCF output  
115 format. CombineGVCFs was then run on batches of ~200 gVCFs to hierarchically  
116 merge them into a single gVCF and a final SNP call was performed using  
117 GenotypeGVCFs jointly on the 5 combined gVCF files, using default read mapping  
118 filters, a standard minimum confidence threshold for emitting (stand-emit-conf) of 10,  
119 and a standard minimum confidence threshold for calling (stand\_call\_conf) of 20. See  
120 Vidalis et al. (2018) for a full description of the pipeline used for calling variants.

### 121 **SNP filtering and map creation**

122 The raw VCF-file including the 828 samples was split into each of the crosses  
123 separately so that the VCF-file for the E477x K954 cross contained 435 progenies plus  
124 parents, and the VCF-file for the E479 x E2089 cross contained 389 progenies plus  
125 parents. Samples that showed inconsistency between phenotype labels on the collected  
126 tissue bags and in the documentation list (17 and 18 samples to the two crosses,  
127 respectively) were removed from the VCF-files before further analysis. The two VCF-  
128 files were then filtered so that only bi-allelic SNPs within the extended probe regions  
129 ( $120 \pm 100$  bp) and without any low-quality tags (QUAL <20) were kept. To increase  
130 the chance of capturing the true genotypes, per site sample genotypes were recoded to  
131 missing data if they had < 5x coverage or a genotype quality < 10. Principle component

132 analyses (PCAs) were performed on the relatedness estimates from vcftools v. 0.1.12b  
133 --relatedness (Danecek et al., 2011), and mislabelled progenies, i.e. progenies not  
134 related to both parents, were removed (Supplementary Figure S1). The last pruning step  
135 was conducted by removing all SNPs showing >50% missing calls, resulting in a final  
136 data set containing 376 samples (including parents) and 333,859 SNPs for the E477 x  
137 K954 cross, and 346 samples (including parents) and 317,071 SNPs for the E479 x  
138 E2089 cross.

139 The genotype data were then exported from the VCF-files and all remaining  
140 analyses were conducted with R (R core team, 2013). The data sets were thereafter  
141 further filtered so that only SNPs where at least one of the parents was heterozygous  
142 were kept. Progeny genotype calls were then recoded to missing data if they showed  
143 genotypes that were not included in a Punnet square based on parental genotypes, and  
144 progenies with > 50% missing calls and SNPs with > 20% missing data were filtered  
145 out. A test for segregation distortion was conducted on the remaining SNPs using a chi-  
146 square test, and all SNPs with a p-value > 0.005 were kept and considered as  
147 informative markers. Each of the informative markers got assigned to the probe region  
148 they belonged to and for each probe, only the most informative marker in terms of the  
149 least amount of missing data and most balanced segregation pattern was kept for map  
150 creation. Finally, the Pendula phenotype was included as a pseudo-genetic marker  
151 (Pendula marker) and the data were recoded into BatchMap input format (Schiffthaler  
152 et al., 2017). This resulted in 340 F<sub>1</sub> progenies (175 pendula and 165 normal crowned)  
153 and 9,737 markers for cross E477xK954 and 306 F<sub>1</sub> progenies (127 pendula and 179  
154 normal crowned) and 16,687 markers for cross E479xE2089.

155 Framework genetic maps were then created separately for the two crosses using  
156 BatchMap (Schiffthaler et al., 2017), a parallelized version of OneMap (Margarido et

157 al., 2007), using a pseudo test cross strategy. To reduce the number of redundant  
158 markers in the map, identical markers (showing no recombination events between  
159 them), were grouped into bins and one marker from each bin was used as a bin  
160 representative in the map creation. Pairwise estimates of recombination frequencies  
161 were calculated between all marker pairs using a LOD score of 14 and a maximum  
162 recombination fraction (max.rf) of 0.35. Markers were grouped into linkage groups  
163 (LGs) and split into maternal and paternal testcrosses. Each testcross LG was ordered  
164 with the “record.parallel()” function using 20 ordering runs over 20 CPU cores. The  
165 genetic distance between ordered markers was calculated using the  
166 “map.overlapping.batches()” approach with 25 markers overlap between batches, a  
167 batch size of ~50 and a ripple window of 11, all parallelized over 2 phase CPU cores  
168 and 20 ripple CPU cores. Highly probable miss-ordered markers, i.e. markers showing  
169 a recombination fraction distance to the closest neighbor on both sides of  $> 0.05$ , were  
170 removed and the full testcross LG was recalculated with a new run of  
171 “map.overlapping.batches()” and the same settings as previously. Finally, to minimize  
172 the effect of genotyping errors on map size, we counted the number of double  
173 recombination events in sliding windows of three markers along the testcross LGs and  
174 thereafter corrected the genetic distances accordingly.

175 To anchor the two crosses LGs and give them a common name, the number of  
176 shared scaffolds between each LG and a previous haploid consensus map for *P. abies*  
177 (Bernhardsson et al., 2019) was used. All LGs were renamed to the haploid consensus  
178 maps LG names (Supplementary Figure S2).

### 179 **QTL mapping and search for candidate genes**

180 Associations between all markers placed on the genetic maps and the branching  
181 phenotype of progenies (pendula or normal crowned) were tested with chi-square tests.



182 The  $-\log_{10}$  (p-value) of the associations were then plotted against the marker position  
183 on the testcross to identify the position(s) of any QTLs. To compensate for the lower  
184 p-values of double heterozygous markers (segregating in both parents), caused by an  
185 extra degree of freedom in the analyses, the p-values for these associations were  
186 multiplied by two in the female maps (E477 and E479).

187 All scaffolds showing marker associations of  $-\log_{10}$  (p-value) > 40 were  
188 considered as candidates for harboring the Pendula locus and all gene models from  
189 these scaffolds were extracted and evaluated in Congenie (<http://congenie.org>) for their  
190 gene ontology (GO) and protein family (PFAM) descriptions and compared to the  
191 *Arabidopsis thaliana* (*Arabidopsis*) database at <http://atgenie.org>. Each transcript  
192 sequence was also compared to the NCBI blastp database  
193 (<https://blast.ncbi.nlm.nih.gov>) to further analyze the function of the genes  
194 (Supplementary File 1).

195 Candidate genes known to be responsible for branching architecture phenotypes  
196 in different angiosperms were positioned on the maps by extracting their corresponding  
197 putative conifer sequence ID. This data was obtained either from earlier published  
198 articles or, when unknown, by performing the BLAST with known gene model  
199 sequences against the Norway spruce draft assembly using blastx at <http://congenie.org>.  
200 The same procedure was performed for genes known to be part of the gravitropism and  
201 phototropism pathways in plants (reviewed in Bemer et al., 2017; Hollender, Waite, et  
202 al., 2018; Hollender & Dardick, 2015; Jiao et al., 2021; Roychoudhry & Kepinski,  
203 2015; Sakai & Haga, 2012; Strohm et al., 2013) by searching for the genes at  
204 atgenie.org and thereafter identifying the corresponding gene models in *P.abies* that  
205 belong to the same orthologous gene family and if possible place them on the genetic  
206 maps based on scaffold position (Supplementary File 2).

207 The best match or ortholog for the Norway spruce genes with non-synonymous  
208 SNPs was detected in *Arabidopsis* by performing Blastp in PlantGenIE  
209 (<https://plantgenie.org>), TAIR (<https://www.arabidopsis.org/index.jsp>) and NCBI  
210 (<https://www.ncbi.nlm.nih.gov/>). The domain regions of these genes (Supplementary  
211 Figures S3-S8) were confirmed by referring to its best match in *Arabidopsis thaliana*  
212 and by performing searches in the Conserved Domain Database (CDD) (Marchler-  
213 Bauer et al., 2015), UniProt (Bateman et al., 2021), and referring to the literature (Pang  
214 et al., 2014; Wagner et al., 2002).

## 215 **Data availability**

216 Raw data is included at <https://doi.org/10.5281/zenodo.7093290>

## 217 **Results & Discussion**

218 Two F<sub>1</sub> crosses were used in the QTL mapping of the Pendula phenotype by creating  
219 two independent sets of parental genetic linkage maps. These maps were then used to  
220 position associations with the qualitative phenotype (pendula or wild-type) using chi-  
221 square tests. A total of 19,139 markers from 14,997 gene-bearing scaffolds of the  
222 Norway spruce draft assembly v.1.0 (Nystedt et al., 2013) could be placed on the maps.  
223 This corresponds to 25.4% of all scaffolds harboring annotated gene models in the v1.0  
224 *P. abies* assembly (14,997 / 58,983 scaffolds), which anchors 9070 high confidence  
225 (HC), 6802 medium confidence (MC) and 2042 low confidence (LC) gene models to  
226 the genetic maps, corresponding to 26.9% of all partially confirmed gene models in the  
227 annotation file (17,914 / 66,632).

228 The first cross, E477 x K954, contained 340 progenies and 9,714 segregating  
229 markers, with 5,525 markers positioned on the female map (E477) and 5,725 markers  
230 on the male map (K954). The total size of the parental maps was estimated to 3,585 cM

231 and 3,571 cM, respectively (Table 1). The second cross, E479 x E2089, contained 306  
232 progenies and 16,658 segregating markers, with 9,392 markers positioned on the female  
233 map (E479) and 9,786 markers on the male map (E2089). The total size of these  
234 parental maps was estimated to 3,393 cM and 3,115 cM, respectively (Table 1). All  
235 four parental maps were grouped into 12 LGs each, corresponding to the haploid  
236 number of chromosomes in *P. abies* (Sax H & Sax K, 1933).

237

238 The number of unique probe-markers per scaffold that were anchored to any of the two  
239 crosses parental maps, ranged between one and six with an average of 1.28 (median 1).  
240 1.4% of all scaffolds (207 out of 14,997) and 5.3% of multi probe-marker scaffolds  
241 (207 out of 3,882) have markers that map to different LGs but where the LG grouping  
242 is consistent between the two crosses. However, 51 markers (0.27% of all markers and  
243 0.7% of all markers present in both crosses), distributed over 48 different scaffolds, do  
244 not show consistent grouping to LGs between the two crosses (supplementary file 3).  
245 When comparing the order of shared markers along the LGs between parental maps,  
246 the estimated correlations (Kendall's tau) range between 0.97 and 0.99. Ranges are in  
247 line with previously estimated correlations between different maps in *P. abies*  
248 (Bernhardsson et al. 2019).

249

250 The significance of the associations between marker genotypes and the Pendula  
251 phenotype ranged from a  $-\log_{10}(\text{p-value})$  of 0 to 55.1 with a mean of 1.0 and a median  
252 of 0.38 for cross E477 x K954. For cross E479 x E2089 the  $-\log_{10}(\text{p-value})$  ranged from  
253 0 to 60.8 with a mean of 1.2 and a median of 0.34. A single large QTL could be detected  
254 in each of the crosses, with a peak positioned close to the center of LG VI (Figure 3).  
255 The Pendula genetic marker that was added to the linkage maps for reference is

256 positioned in the middle of the QTL in both female maps (black horizontal line for E477  
257 and E479 on LGVI in Figure 3). None of the markers located on any of the other 11  
258 LGs show any evidence of association with the Pendula phenotype. The four parental  
259 framework maps show slightly different marker orders (order correlations ranged  
260 between 0.97 and 0.99), but the overall genomic patterns are the same (Figure 2).  
261 However, this inconsistency in marker order within shorter regions of a genetic map is  
262 quite typical and has been seen in several other previously published maps. This is most  
263 probably caused by a combination of the heuristic ordering algorithms used for creating  
264 dense maps and possible genotyping errors caused by insufficient sequencing depth at  
265 some markers (Kelley & Salzberg, 2010; Khan et al., 2012; Salzberg & Yorke, 2005).  
266 Since the Pendula phenotype behaves like a qualitative rather than quantitative trait, we  
267 chose to include the phenotype as a pseudo-genetic marker in the genetic maps in  
268 addition to performing associations against all other markers. The peak of the QTL and  
269 position of the Pendula trait ‘marker’ falls at the same location in both maps, which  
270 strengthens the robustness of the results. All scaffolds with top associations,  $-\log_{10}(\text{p-}$   
271  $\text{value}) > 40$  for markers segregating only in mothers and  $-\log_{10}(\text{p-value}) * 2 > 40$  for  
272 markers segregating in both parents, were investigated for containing candidate genes.  
273 In total, 169 probe-markers distributed over 146 scaffolds show high associations.  
274 These scaffolds contain 181 annotated gene models of which 131 gene models have  
275 orthologous gene family members in *Arabidopsis* (Supplementary File 1).

276 Previously identified genes responsible for branching architecture (Bemer et al.,  
277 2017; Hollender, Waite, et al., 2018; Hollender & Dardick, 2015; Jiao et al., 2021;  
278 Roychoudhry & Kepinski, 2015; Sakai & Haga, 2012; Strohm et al., 2013) were aligned  
279 to the Norway spruce draft assembly and, if found, anchored to the genetic map. A total  
280 of 391 gene models were tested, belonging to 28 gene families associated with

281 gravitropism/phototropism (including *WEEPI*, *WEEP2*, *LAZY1*, *TAC1* and *FUL*).  
282 Overall, 118 of these gene models (30.2%), from 21 gene families, could be anchored  
283 to the genetic maps and are distributed over all 12 LGs and their corresponding putative  
284 conifer sequence ID (MA\_181281g0010 and MA\_10435286g0010 for *WEEP*,  
285 gi|21187158, gi|49450754 for *LAZY*, gi|69453051 for *TAC* and no clear sequence for  
286 *FUL*) were identified in the Norway spruce v.1.0 genome assembly. The *WEEP* genes  
287 that have been found to yield a pendulous phenotype in peach (*Prunus persica*) to  
288 (Hollender, Waite, et al., 2018) are positioned on LG X (*WEEPI*, MA\_181281g0010)  
289 and LG V (*WEEP2*, MA\_10435286g0010). The IGT gene family, which harbors  
290 several genes known to influence plant architecture in angiosperms, including *LAZY*,  
291 *TAC* (*Tillar angle control*) and *DRO* (*Deeper rooting*) (Hollender, Waite, et al., 2018;  
292 Jiao et al., 2021; Waite & Dardick, 2020), appears to be a single copy gene in *P. abies*  
293 as we can only identify a single homolog, MA\_39199g0010. This gene is positioned at  
294 the distal ends of LG I. 19 of the gene models, from 10 different gene families, are  
295 located on LG VI. However, none of the gene models anchored to LG VI are positioned  
296 close to the center of the QTL (Supplementary File 2). Even though the list of candidate  
297 genes positioned within a 5 cM genetic distance from the *Pendula* marker is still fairly  
298 large (Supplementary Table S1 and S2), we can now rule out most of the earlier known  
299 genes involved in tree branching architecture, including the gravitropism and  
300 phototropism biosynthesis pathways.

301 For female E477, 43 probe-markers, from 41 different scaffolds, are positioned  
302 within a 5 cM distance from the *Pendula* marker, with the closest markers occurring at  
303 a distance of 0.82 cM (Supplementary Table S1). Seven probe-markers are positioned  
304 at this closest distance and one of them, MA\_10436629:1, does also show the most  
305 significant association for the whole cross (p-value 5.58e-56). This probe-marker is

306 located within the gene model MA\_10436629g0010, which transcribes an  
307 adenylosuccinate synthase (ADSS) (Supplementary Table S2) and is also present in the  
308 cross E479 x E2089, positioned 12.81 cM away from the pendula marker on the E477  
309 map but show a highly significant association (p-value 9.53e-60). This gene class is  
310 involved in the *de novo* purine biosynthesis pathway (Stayton et al., 1983), which is a  
311 central metabolic function (Smith & Atkins, 2002) and has been described to express  
312 at higher levels in the shoot apex vegetative, young leaves and rosette  
313 ([bar.utoronto.ca/eplant](http://bar.utoronto.ca/eplant)) (Toufighi et al., 2005). To the best of our knowledge, research  
314 has not been conducted so far on the effect of alteration in the function of this gene on  
315 plant phenotypes, but is known to be the target of a strong herbicide, hydantocycin  
316 (Siehl et al., 1996), which again highlights the central role of this enzyme in plant cell  
317 metabolism.

318 For female E479, 31 probe-markers, from 29 different scaffolds, are positioned  
319 within a 5 cM distance from the Pendula marker, with two probe-markers positioned at  
320 the same position as the Pendula marker (Supplementary Table S2). These two probe-  
321 markers are located within the gene models MA\_312116g0010, transcribing a  
322 lumazine-binding family protein involved in riboflavin synthase/biosynthesis, and  
323 MA\_10432730g0010, transcribing a P-loop containing nucleoside triphosphate  
324 hydrolases superfamily protein. Both of these probe-markers are present as double  
325 heterozygotes in the parents (E479 x E2089) but MA\_312116:1 shows the most  
326 significant p-value of the double heterozygous markers for the cross (p-value 7.17e-30,  
327 Table 3). MA\_312116:1 is also present as a double heterozygous marker in the E477 x  
328 K954 cross, and are there positioned 1.22 cM away from the Pendula marker in the  
329 E477 map and shows the strongest association of all double heterozygous markers (p-  
330 value 1.14e-31, (Supplementary Table S1). The probe-marker showing the strongest

331 association for cross E479 x E2089 is MA\_114136:1 (p-value 1.72e-61) located within  
332 the gene model MA\_114136g0010, which transcribes a ribosomal protein S26e family  
333 protein and is positioned 0.48 cM away from the Pendula marker on the E479 map  
334 (Supplementary Table S2).

335         There are 12 probe-markers significantly associated with the Pendula marker in  
336 both crosses (Table 2). Those with the highest p-values are MA\_34514 and  
337 MA\_10429386 located within the gene models MA\_34514g0010 and  
338 MA\_10429386g0010, respectively, which transcribe a membrane trafficking VPS54  
339 family protein. Among these gene models, non-synonymous SNPs were detected in the  
340 coding regions of five Norway spruce genes. However, only one of these markers  
341 (MA\_51707:1) had the same SNP located within the coding region of the gene leading  
342 to an aminoacid change in both the crosses. Supplementary Table S3 presents the details  
343 of these genes including the alignment information of their corresponding proteins with  
344 *Arabidopsis* proteins (Supplementary Figures 3-7) representing the actual alignments  
345 performed with MUSCLE (Edgar, 2004). Four genes gave the corresponding BLAST  
346 hit in *Arabidopsis* (Supplementary Table S3). The putative *Arabidopsis* orthologues of  
347 these genes are involved in various plant processes such as growth, defense and stress  
348 response. GLUTATHIONE S-TRANSFERASEs is a huge gene family. One of the  
349 members of this family, GLUTATHIONE S-TRANSFERASE U17 (ATGSTU17;  
350 AT1G10370) is involved in the modulation of seedling development in *Arabidopsis*.  
351 ATGSTU17 participates in the regulation of the architecture of *Arabidopsis*  
352 inflorescence by regulating the expression of AtMYB13 gene, which in turn acts at  
353 branching points of the inflorescence (Jiang et al., 2010; Kirik et al., 1998). No  
354 significant sequence similarity was detected between AT1G10370 and its ortholog in

355 spruce MA\_5480022p0010, yet the amino acid Tryptophan (W) where the SNP was  
356 located appears to be conserved between both species (Supplementary Figure S7).

357         The only marker that presents a common non-synonymous SNP in both crosses  
358 is MA\_51707.1. Its closest BLAST hit in *Arabidopsis* is AT4G04350 - EMBRYO  
359 DEFECTIVE 2369 (EMB2369; tRNA synthetase class I family protein). This gene is  
360 highly expressed in young leaves and pedicels (Klepikova atlas). Aminoacyl-transfer  
361 RNA synthetases have been identified as key players in translation and they have an  
362 early role in protein synthesis (Brandao and Silva-Filho, 2011). It is involved in embryo  
363 and plant development (Meinke, 2020). One of the orthologs of this gene was found to  
364 be related to the architecture of the embryo and kernel size in maize (X. Li et al., 2022).  
365 However, no information regarding phenotype changes in other species is available.  
366 We propose that the characterisation of this gene may give insights into tree architecture  
367 in spruce.

368

369 Since the genetic maps only managed to anchor ~26% of all partially validated gene  
370 models in the *P. abies* genome assembly v 1.0 (Nystedt et al. 2013) there is a risk that  
371 we missed the causative gene. However, creating a genetic map that anchors all 66,632  
372 validated gene models is not feasible until a less fragmented and more complete genome  
373 assembly with additional gene models per scaffold is made available.

#### 374 **Data availability statement**

375 Raw data is available at <https://doi.org/10.5281/zenodo.7093290>

#### 376 **Acknowledgements**

377 This work was supported by grants from the Knut and Alice Wallenberg Foundation  
378 and the Swedish Governmental Agency for Innovation Systems (VINNOVA).



379 **Conflict of interest**

380 The authors declare no conflict of interest

381 **Funder information**

382 CB and the project was funded by Kempestiftelserna foundation

383

384 **Author contribution**

385 RGG planned the project, POP organized the sample collection, CB extracted DNA,  
386 CB and DGS performed alignment and SNP calling, CB and PKI filtered the data and  
387 made all maps and QTL analysis, FGM and SSR performed deeper SNP analysis, gene  
388 alignments of candidate genes and major modifications to the original draft, CB wrote  
389 the first draft, FGM and SRR finalized the draft, all authors commented to the final  
390 draft of the manuscript.

391

392 **Literature cited**

- 393 Bateman, A., Martin, M. J., Orchard, S., Magrane, M., Agivetova, R., Ahmad, S.,  
394 Alpi, E., Bowler-Barnett, E. H., Britto, R., Bursteinas, B., Bye-A-Jee, H.,  
395 Coetzee, R., Cukura, A., da Silva, A., Denny, P., Dogan, T., Ebenezer, T. G.,  
396 Fan, J., Castro, L. G., ... Zhang, J. (2021). UniProt: the universal protein  
397 knowledgebase in 2021. *Nucleic Acids Research*, 49(D1), D480–D489.  
398 <https://doi.org/10.1093/NAR/GKAA1100>
- 399 Bemer, M., van Mourik, H., Muiño, J. M., Ferrándiz, C., Kaufmann, K., & Angenent,  
400 G. C. (2017). FRUITFULL controls SAUR10 expression and regulates  
401 Arabidopsis growth and architecture. *Journal of Experimental Botany*, 68(13),  
402 3391. <https://doi.org/10.1093/JXB/ERX184>
- 403 Bernhardsson, C., Vidalis, A., Wang, X., Scofield, D. G., Schiffthaler, B., Baison, J.,  
404 Street, N. R., Rosario García-Gil, M., & Ingvarsson, P. K. (2019). An Ultra-  
405 Dense Haploid Genetic Map for Evaluating the Highly Fragmented Genome  
406 Assembly of Norway Spruce (*Picea abies*). *G3 (Bethesda, Md.)*, 9(5), 1623–  
407 1632. <https://doi.org/10.1534/G3.118.200840>
- 408 Danecek, P., Auton, A., Abecasis, G., Albers, C. A., Banks, E., DePristo, M. A.,  
409 Handsaker, R. E., Lunter, G., Marth, G. T., Sherry, S. T., McVean, G., & Durbin,  
410 R. (2011). The variant call format and VCFtools. *Bioinformatics*, 27(15).  
411 <https://doi.org/10.1093/bioinformatics/btr330>
- 412 Dardick, C., Callahan, A., Horn, R., Ruiz, K. B., Zhebentyayeva, T., Hollender, C.,  
413 Whitaker, M., Abbott, A., & Scorza, R. (2013). PpeTAC1 promotes the  
414 horizontal growth of branches in peach trees and is a member of a functionally  
415 conserved gene family found in diverse plants species. *Plant Journal*, 75(4).  
416 <https://doi.org/10.1111/tpj.12234>
- 417 DePristo, M. A., Banks, E., Poplin, R., Garimella, K. V, Maguire, J. R., Hartl, C.,  
418 Philippakis, A. A., del Angel, G., Rivas, M. A., Hanna, M., McKenna, A.,

- 419 Fennell, T. J., Kernytsky, A. M., Sivachenko, A. Y., Cibulskis, K., Gabriel, S.  
420 B., Altshuler, D., & Daly, M. J. (2011). A framework for variation discovery and  
421 genotyping using next-generation DNA sequencing data. *Nat Genet*, *43*(5), 491–  
422 498. <https://doi.org/10.1038/ng.806>
- 423 Edgar, R. C. (2004). MUSCLE: Multiple sequence alignment with high accuracy and  
424 high throughput. *Nucleic Acids Research*, *32*(5).  
425 <https://doi.org/10.1093/nar/gkh340>
- 426 Fladung, M. (2021). Targeted crispr/cas9-based knock-out of the rice orthologs tiller  
427 angle control 1 (TAC1) in poplar induces erect leaf habit and shoot growth.  
428 *Forests*, *12*(12). <https://doi.org/10.3390/F12121615>
- 429 Gerendiain, A. Z., Peltola, H., Pulkkinen, P., Ikonen, V. P., & Jaatinen, R. (2008).  
430 Differences in growth and wood properties between narrow and normal crowned  
431 types of Norway spruce grown at narrow spacing in Southern Finland. *Silva*  
432 *Fennica*, *42*(3). <https://doi.org/10.14214/sf.247>
- 433 Hollender, C. A., & Dardick, C. (2015). Molecular basis of angiosperm tree  
434 architecture. *New Phytologist*, *206*(2). <https://doi.org/10.1111/nph.13204>
- 435 Hollender, C. A., Pascal, T., Tabb, A., Hadiarto, T., Srinivasan, C., Wang, W., Liu,  
436 Z., Scorza, R., & Dardick, C. (2018). Loss of a highly conserved sterile alpha  
437 motif domain gene (WEEP) results in pendulous branch growth in peach trees.  
438 *Proceedings of the National Academy of Sciences of the United States of*  
439 *America*, *115*(20). <https://doi.org/10.1073/pnas.1704515115>
- 440 Hollender, C. A., Waite, J. M., Tabb, A., Raines, D., Chinnithambi, S., & Dardick, C.  
441 (2018). Alteration of TAC1 expression in Prunus species leads to pleiotropic  
442 shoot phenotypes. *Horticulture Research* *2018* *5:1*, *5*(1), 1–9.  
443 <https://doi.org/10.1038/s41438-018-0034-1>
- 444 Jiang, H. W., Liu, M. J., Chen, I. C., Huang, C. H., Chao, L. Y., & Hsieh, H. L.  
445 (2010). A glutathione s-transferase regulated by light and hormones participates  
446 in the modulation of arabidopsis seedling development. *Plant Physiology*,  
447 *154*(4). <https://doi.org/10.1104/pp.110.159152>
- 448 Jiao, Z., Du, H., Chen, S., Huang, W., & Ge, L. (2021). LAZY Gene Family in Plant  
449 Gravitropism. *Frontiers in Plant Science*, *11*, 2096.  
450 <https://doi.org/10.3389/FPLS.2020.606241/BIBTEX>
- 451 Karki, L., & Tigerstedt, P. M. A. (1985). Definition and exploitation of forest tree  
452 ideotypes in Finland. In *Attributes of trees as crop plants / edited by M.G.R.*  
453 *Cannell and J.E. Jackson*. [Abbots Ripton, Huntingdon] : Institute of Terrestrial  
454 Ecology, 1985.
- 455 Kelley, D., & Salzberg, S. (2010). Detection and correction of false segmental  
456 duplications caused by genome mis-assembly. *Genome Biology*, *11*.
- 457 Khan, M. A., Han, Y., Zhao, Y. F., Troggo, M., & Korban, S. S. (2012). A Multi-  
458 Population Consensus Genetic Map Reveals Inconsistent Marker Order among  
459 Maps Likely Attributed to Structural Variations in the Apple Genome. *PLOS*  
460 *ONE*, *7*(11), e47864. <https://doi.org/10.1371/JOURNAL.PONE.0047864>
- 461 Kirik, V., Kölle, K., Wohlfarth, T., Miséra, S., & Bäumlein, H. (1998). Ectopic  
462 expression of a novel MYB gene modifies the architecture of the Arabidopsis  
463 inflorescence. *Plant Journal*, *13*(6). <https://doi.org/10.1046/j.1365-313X.1998.00072.x>
- 464  
465 Lehner, A., Pöykkö, T., Lehner, A., Campbell, M., Wheeler T Pi, N. C., Gliissl, J.,  
466 Kreike, J., Neale, D. B., & Wheeler, N. C. (1995). Breeding for Crop Trees View  
467 project From sustainable design to sustainable implementation-Knowledge value  
468 chains for green economy View project Identification of a RAPD marker linked

- 469 to the pendula gene in Norway spruce (*Picea abies* (L.) Karst. f. *pendula*). *Theor*  
470 *Appl Genet*, 91, 1092–1094. <https://doi.org/10.1007/BF00223924>
- 471 Lepistö, M. (1985). Riippakuusen periytymisestä ja kapealavaisuuden  
472 hyväksikäytöstä kuusen jalostuksessa. Summary: The inheritance of pendula  
473 spruce (*Picea abies* f. *pendula*) and utilization of the narrow-crowned type in  
474 spruce breeding. *Foundation for Forest Tree Breeding, Information*, 1, 1–6.
- 475 Leyser, O. (2008). Strigolactones and Shoot Branching: A New Trick for a Young  
476 Dog. In *Developmental Cell* (Vol. 15, Issue 3).  
477 <https://doi.org/10.1016/j.devcel.2008.08.008>
- 478 Li, H., & Durbin, R. (2009). Fast and accurate short read alignment with Burrows-  
479 Wheeler transform. *Bioinformatics*, 25(14), 1754–1760.  
480 <https://doi.org/10.1093/bioinformatics/btp324>
- 481 Li, H., Handsaker, B., Wysoker, A., Fennell, T., Ruan, J., Homer, N., Marth, G.,  
482 Abecasis, G., Durbin, R., & 1000 Genome Project Data Processing Subgroup.  
483 (2009). The Sequence Alignment/Map format and SAMtools. *Bioinformatics*,  
484 25(16), 2078–2079. <https://doi.org/10.1093/bioinformatics/btp352>
- 485 Li, X., Wang, M., Zhang, R., Fang, H., Fu, X., Yang, X., & Li, J. (2022). Genetic  
486 architecture of embryo size and related traits in maize. *Crop Journal*, 10(1).  
487 <https://doi.org/10.1016/j.cj.2021.03.007>
- 488 Marchler-Bauer, A., Derbyshire, M. K., Gonzales, N. R., Lu, S., Chitsaz, F., Geer, L.  
489 Y., Geer, R. C., He, J., Gwadz, M., Hurwitz, D. I., Lanczycki, C. J., Lu, F.,  
490 Marchler, G. H., Song, J. S., Thanki, N., Wang, Z., Yamashita, R. A., Zhang, D.,  
491 Zheng, C., & Bryant, S. H. (2015). CDD: NCBI’s conserved domain database.  
492 *Nucleic Acids Research*, 43(Database issue), D222–D226.  
493 <https://doi.org/10.1093/NAR/GKU1221>
- 494 Margarido, G. R. A., Souza, A. P., & Garcia, A. A. F. (2007). OneMap: software for  
495 genetic mapping in outcrossing species. *Hereditas*, 144(3), 78–79.  
496 <https://doi.org/10.1111/J.2007.0018-0661.02000.X>
- 497 McKenna, A., Hanna, M., Banks, E., Sivachenko, A., Cibulskis, K., Kernysky, A.,  
498 Garimella, K., Altshuler, D., Gabriel, S., Daly, M., & DePristo, M. A. (2010).  
499 The Genome Analysis Toolkit: a MapReduce framework for analyzing next-  
500 generation DNA sequencing data. *Genome Research*, 20(9), 1297–1303.  
501 <https://doi.org/10.1101/gr.107524.110>
- 502 Nystedt, B., Street, N. R., Wetterbom, A., Zuccolo, A., Lin, Y. C., Scofield, D. G.,  
503 Vezzi, F., Delhomme, N., Giacomello, S., Alexeyenko, A., Vicedomini, R.,  
504 Sahlin, K., Sherwood, E., Elfstrand, M., Gramzow, L., Holmberg, K., Hällman,  
505 J., Keech, O., Klasson, L., ... Jansson, S. (2013). The Norway spruce genome  
506 sequence and conifer genome evolution. *Nature* 2013 497:7451, 497(7451),  
507 579–584. <https://doi.org/10.1038/nature12211>
- 508 Pang, Y. L. J., Poruri, K., & Martinis, S. A. (2014). tRNA synthetase: TRNA  
509 aminoacylation and beyond. *Wiley Interdisciplinary Reviews: RNA*, 5(4).  
510 <https://doi.org/10.1002/wrna.1224>
- 511 Pöykkö, V. T., & Pulkkinen, P. O. (1990). Characteristics of normal-crowned and  
512 pendula spruce (*Picea abies* (L.) Karst.) examined with reference to the  
513 definition of a crop tree ideotype. *Tree Physiology*, 7(1-2-3-4).  
514 <https://doi.org/10.1093/treephys/7.1-2-3-4.201>
- 515 Pulkkinen, P., & Poykko, T. (1990). Inherited narrow crown form, harvest index and  
516 stem biomass production in Norway spruce, *Picea abies*. *Tree Physiology*, 6(4).  
517 <https://doi.org/10.1093/treephys/6.4.381>

- 518 R core team. (2013). R Core Team. In *R: A Language and Environment for Statistical*  
519 *Computing* (Vol. 55).
- 520 Roychoudhry, S., & Kepinski, S. (2015). Shoot and root branch growth angle control-  
521 the wonderfulness of lateralness. In *Current Opinion in Plant Biology* (Vol. 23).  
522 <https://doi.org/10.1016/j.pbi.2014.12.004>
- 523 Sakai, T., & Haga, K. (2012). Molecular Genetic Analysis of Phototropism in  
524 *Arabidopsis*. *Plant and Cell Physiology*, 53(9), 1517–1534.  
525 <https://doi.org/10.1093/PCP/PCS111>
- 526 Salzberg, S., & Yorke, J. (2005). Beware of mis-assembled genomes. *Bioinformatics*,  
527 21.
- 528 Sax H., & Sax K. (1933). Chromosome number and morphology in the conifers.  
529 *Journal of the Arnold Arboretum*, 14, 356–375.
- 530 Schiffthaler, B., Bernhardsson, C., Ingvarsson, P. K., & Street, N. R. (2017).  
531 BatchMap: A parallel implementation of the OneMap R package for fast  
532 computation of F1 linkage maps in outcrossing species. *PLOS ONE*, 12(12),  
533 e0189256. <https://doi.org/10.1371/JOURNAL.PONE.0189256>
- 534 Siehl, D. L., Subramanian, M. v, Walters, E. W., Lee, S.-F., Anderson, R. J., &  
535 Toschi, A. G. (1996). Adenylosuccinate Synthetase: Site of Action of  
536 Hydantocidin, a Microbial Phytotoxin. *Plant Physiol*, 110, 753–758.
- 537 Smith, P. M. C., & Atkins, C. A. (2002). Purine biosynthesis. Big in cell division,  
538 even bigger in nitrogen assimilation. *Plant Physiology*, 128(3), 793–802.  
539 <https://doi.org/10.1104/PP.010912>
- 540 Stayton, M. M., Rudolph, F. B., & Fromm, H. J. (1983). Regulation, Genetics, and  
541 Properties of Adenylosuccinate Synthetase: A Review. *Current Topics in*  
542 *Cellular Regulation*, 22(C), 103–141. [https://doi.org/10.1016/B978-0-12-](https://doi.org/10.1016/B978-0-12-152822-5.50008-7)  
543 [152822-5.50008-7](https://doi.org/10.1016/B978-0-12-152822-5.50008-7)
- 544 Strohm, A., Baldwin, K., & Masson, P. H. (2013). Gravitropism in *Arabidopsis*  
545 *thaliana*. *Brenner's Encyclopedia of Genetics: Second Edition*, 358–361.  
546 <https://doi.org/10.1016/B978-0-12-374984-0.00662-8>
- 547 Toufighi, K., Brady, S. M., Austin, R., Ly, E., & Provar, N. J. (2005). The Botany  
548 Array Resource: e-Northern, Expression Angling, and promoter analyses. *The*  
549 *Plant Journal*, 43(1), 153–163. [https://doi.org/10.1111/J.1365-](https://doi.org/10.1111/J.1365-313X.2005.02437.X)  
550 [313X.2005.02437.X](https://doi.org/10.1111/J.1365-313X.2005.02437.X)
- 551 Van der Auwera, G. A., Carneiro, M. O., Hartl, C., Poplin, R., del Angel, G., Levy-  
552 Moonshine, A., Jordan, T., Shakir, K., Roazen, D., Thibault, J., Banks, E.,  
553 Garimella, K. V., Altshuler, D., Gabriel, S., DePristo, M. A., Auwera, G. A.,  
554 Carneiro, M. O., Hartl, C., Poplin, R., ... DePristo, M. A. (2013). From FastQ  
555 Data to High-Confidence Variant Calls: The Genome Analysis Toolkit Best  
556 Practices Pipeline. In *Current Protocols in Bioinformatics* (pp. 11.10.1-  
557 11.10.33). John Wiley & Sons, Inc.  
558 <https://doi.org/10.1002/0471250953.bi1110s43>
- 559 Vidalis, A., Scofield, D. G., Neves, L. G., Bernhardsson, C., García-Gil, M. R., &  
560 Ingvarsson, P. K. (2018). Design and evaluation of a large sequence-capture  
561 probe set and associated SNPs for diploid and haploid samples of Norway spruce  
562 (*Picea abies*). *BioRxiv*, 291716. <https://doi.org/10.1101/291716>
- 563 Wagner, U., Edwards, R., Dixon, D. P., & Mauch, F. (2002). Probing the diversity of  
564 the *Arabidopsis* glutathione S-transferase gene family. *Plant Molecular Biology*,  
565 49(5). <https://doi.org/10.1023/A:1015557300450>
- 566 Waite, J. M., & Dardick, C. (2020). IGT/LAZY family genes are differentially  
567 influenced by light signals and collectively required for light-induced changes to

568 branch angle. *BioRxiv*, 2020.07.15.205625.

569 <https://doi.org/10.1101/2020.07.15.205625>

570 Xu, D., Qi, X., Li, J., Han, X., Wang, J., Jiang, Y., Tian, Y., & Wang, Y. (2017).

571 PzTAC and PzLAZY from a narrow-crown poplar contribute to regulation of

572 branch angles. *Plant Physiology and Biochemistry : PPB*, 118, 571.

573 <https://doi.org/10.1016/J.PLAPHY.2017.07.011>

574

575

576

577

578 Table 1. Descriptive parameters of the genetic maps.

| LG          | E477 (♀ pendula) x K954 (♂ wt) |                      |                        |                      |                    | E479 (♀ pendula) x E2089 (♂ wt) |                      |                         |                       |                    |
|-------------|--------------------------------|----------------------|------------------------|----------------------|--------------------|---------------------------------|----------------------|-------------------------|-----------------------|--------------------|
|             | E477 markers<br>(bins)         | E477<br>size<br>(cM) | K954 markers<br>(bins) | K954<br>size<br>(cM) | Shared<br>markers* | E479 markers<br>(bins)          | E479<br>size<br>(cM) | E2089 markers<br>(bins) | E2089<br>size<br>(cM) | Shared<br>markers* |
| <b>I</b>    | 498 (462)                      | 364.0                | 575 (522)              | 372.8                | 149                | 903 (697)                       | 309.9                | 900 (710)               | 331.2                 | 201                |
| <b>II</b>   | 456 (411)                      | 282.5                | 500 (448)              | 283.6                | 141                | 754 (594)                       | 252.0                | 829 (642)               | 278.7                 | 216                |
| <b>III</b>  | 506 (446)                      | 288.6                | 417 (374)              | 289.9                | 107                | 849 (659)                       | 298.7                | 818 (650)               | 302.4                 | 243                |
| <b>IV</b>   | 462 (403)                      | 302.2                | 431 (394)              | 306.3                | 120                | 750 (577)                       | 301.8                | 726 (569)               | 238.6                 | 187                |
| <b>V</b>    | 466 (416)                      | 324.1                | 467 (426)              | 305.5                | 114                | 785 (600)                       | 284.1                | 852 (680)               | 275.5                 | 216                |
| <b>VI</b>   | 420 (363)                      | 234.1                | 471 (404)              | 243.6                | 108                | 757 (571)                       | 292.2                | 776 (607)               | 211.9                 | 209                |
| <b>VII</b>  | 495 (449)                      | 341.7                | 513 (451)              | 381.7                | 134                | 802 (618)                       | 295.8                | 930 (700)               | 316.7                 | 243                |
| <b>VIII</b> | 519 (459)                      | 341.5                | 516 (473)              | 330.5                | 145                | 813 (605)                       | 360.5                | 841 (648)               | 246.5                 | 184                |
| <b>IX</b>   | 327 (302)                      | 254.4                | 440 (397)              | 266.2                | 101                | 771 (584)                       | 285.8                | 816 (604)               | 255.0                 | 208                |

|              |               |         |               |         |       |               |         |               |         |       |
|--------------|---------------|---------|---------------|---------|-------|---------------|---------|---------------|---------|-------|
| <b>X</b>     | 464 (422)     | 275.4   | 459 (417)     | 264.4   | 139   | 749 (564)     | 243.3   | 748 (569)     | 233.2   | 180   |
| <b>XI</b>    | 440 (368)     | 268.5   | 401 (361)     | 224.2   | 132   | 596 (440)     | 211.6   | 710 (489)     | 185.4   | 199   |
| <b>XII</b>   | 472 (422)     | 308.0   | 535 (470)     | 302.7   | 146   | 863 (651)     | 257.2   | 840 (665)     | 240.3   | 234   |
| <b>Total</b> | 5,525 (4,923) | 3,585.1 | 5,725 (5,137) | 3,571.5 | 1,536 | 9,392 (7,160) | 3,393.1 | 9,786 (7,533) | 3,115.3 | 2,520 |

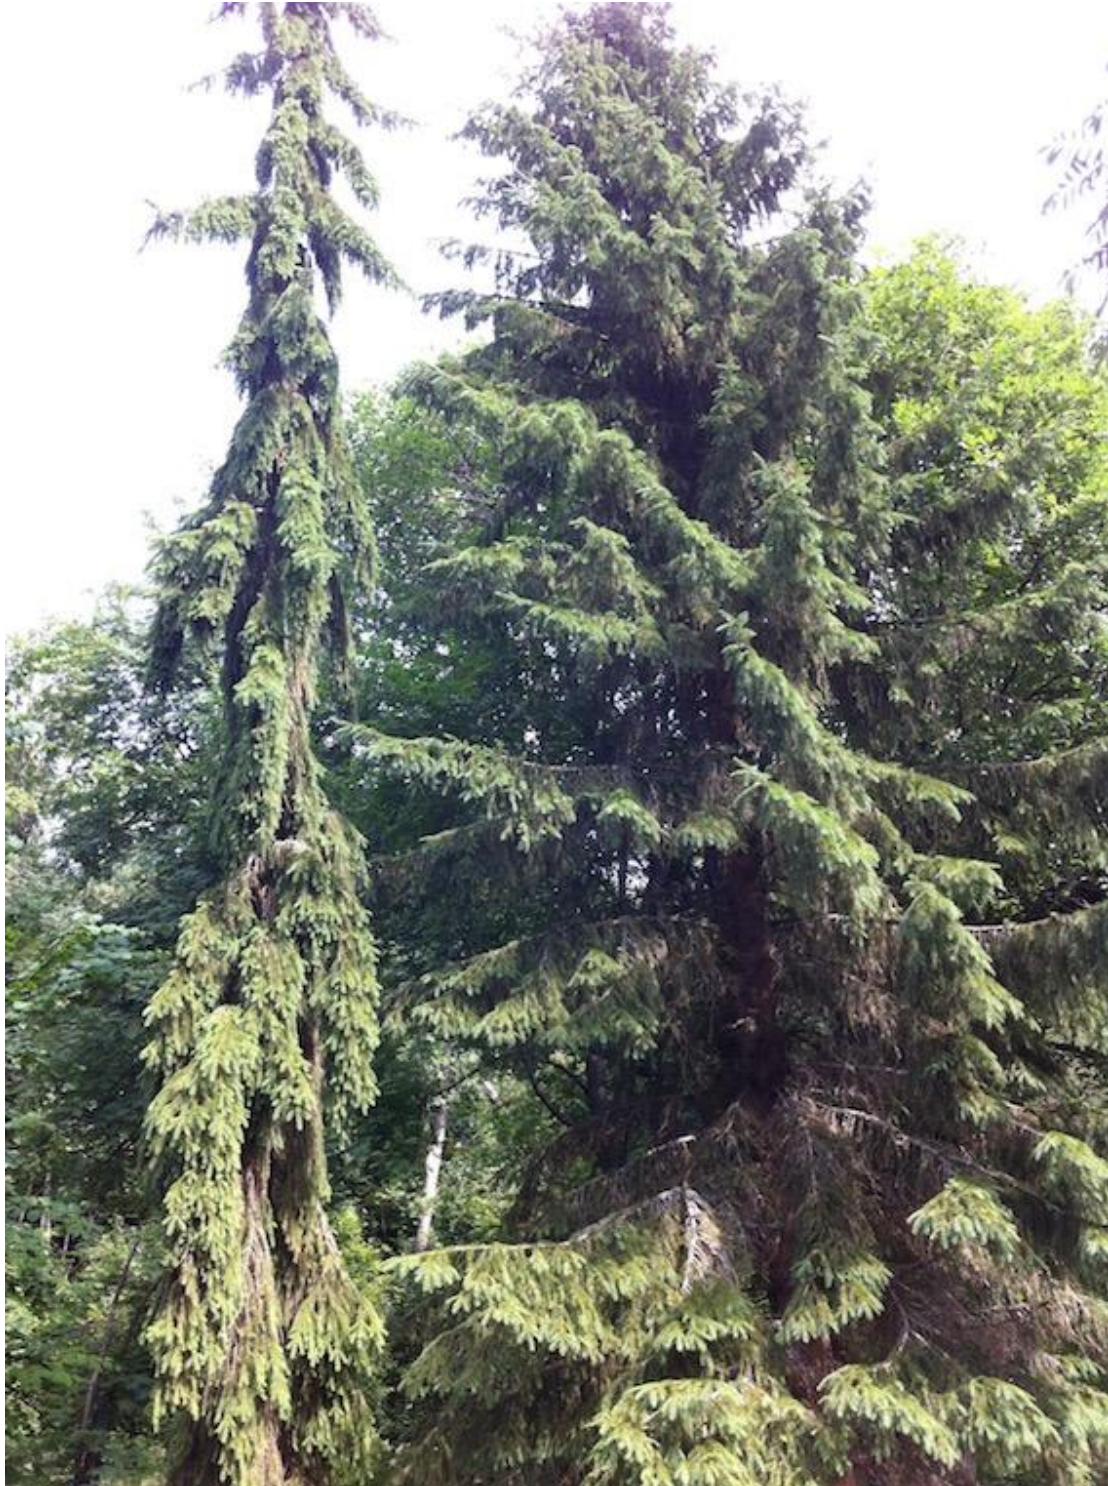

Figure 1. Pendula (left) and regular (right) Norway spruce trees. Photo taken at Arboretum Norr in Umeå, Sweden. Photo taken by Carolina Bernhardsson, summer 2013.





### LGVI map correlations

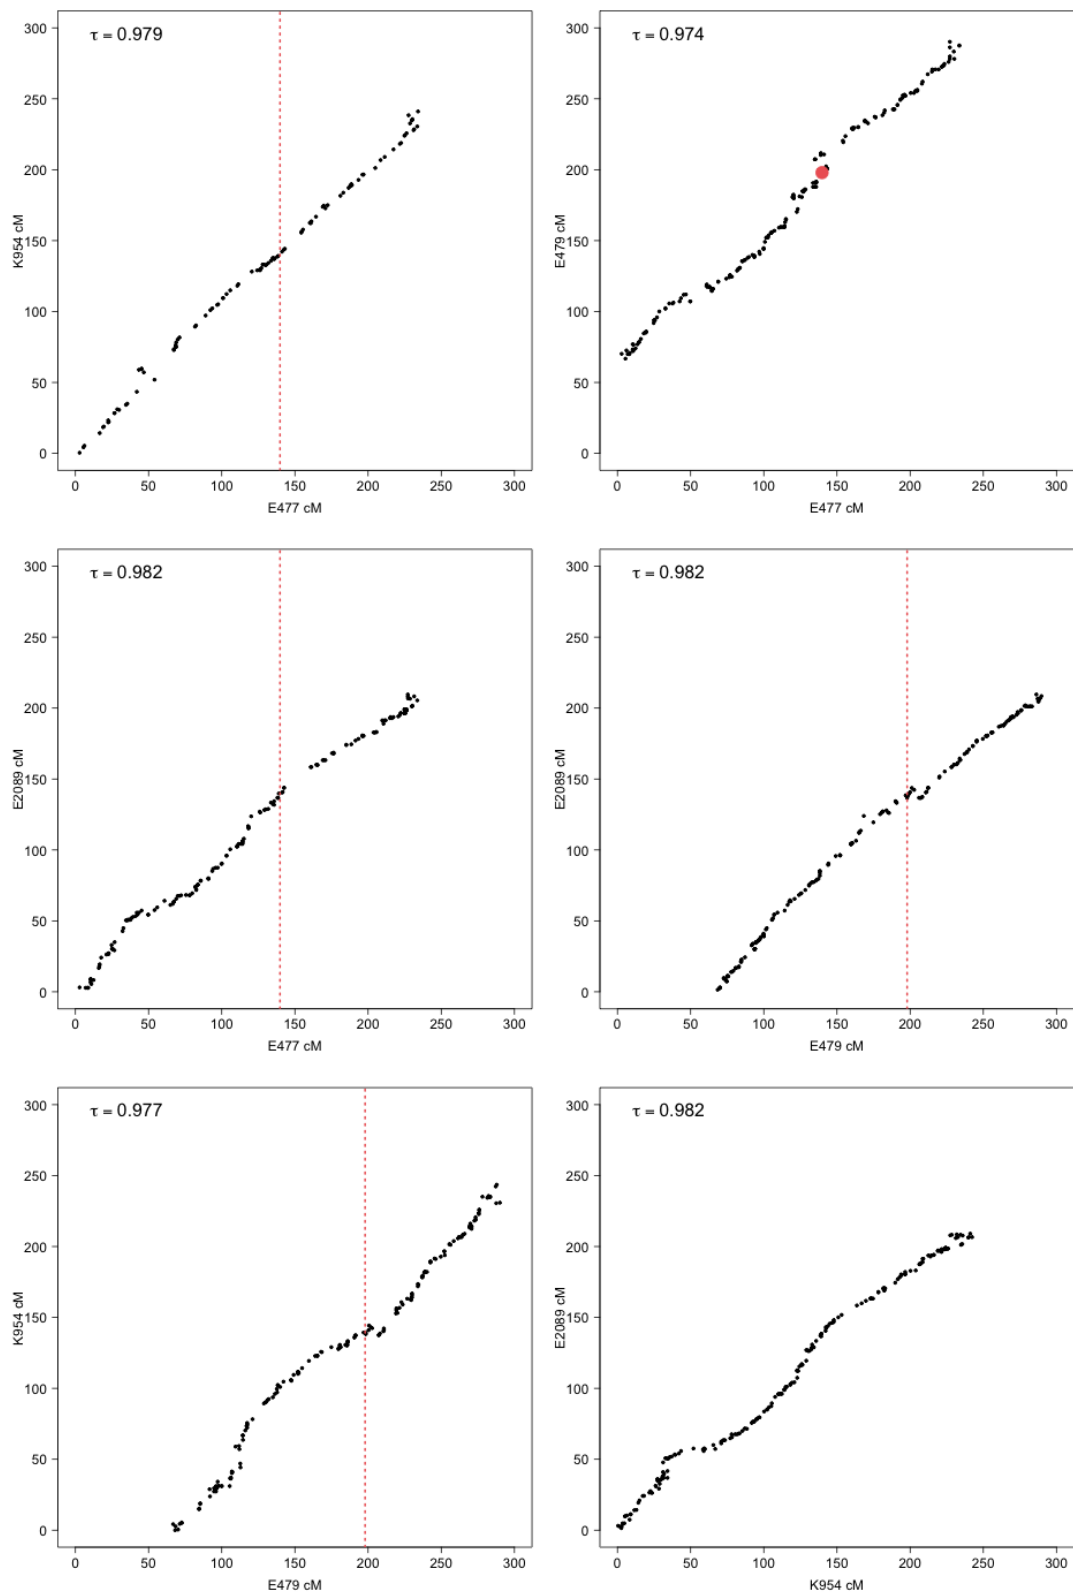

Figure 2: Marker order correlations of LG VI between parental maps. Red dot in top right figure show the position of the pendula marker between E477 and E479. Red dotted lines show the position of the pendula marker when only one of the compared parental maps harbor the marker (E477 or E479). The order correlation, estimated with Kendall's tau, is shown in the top left corner of each plot.

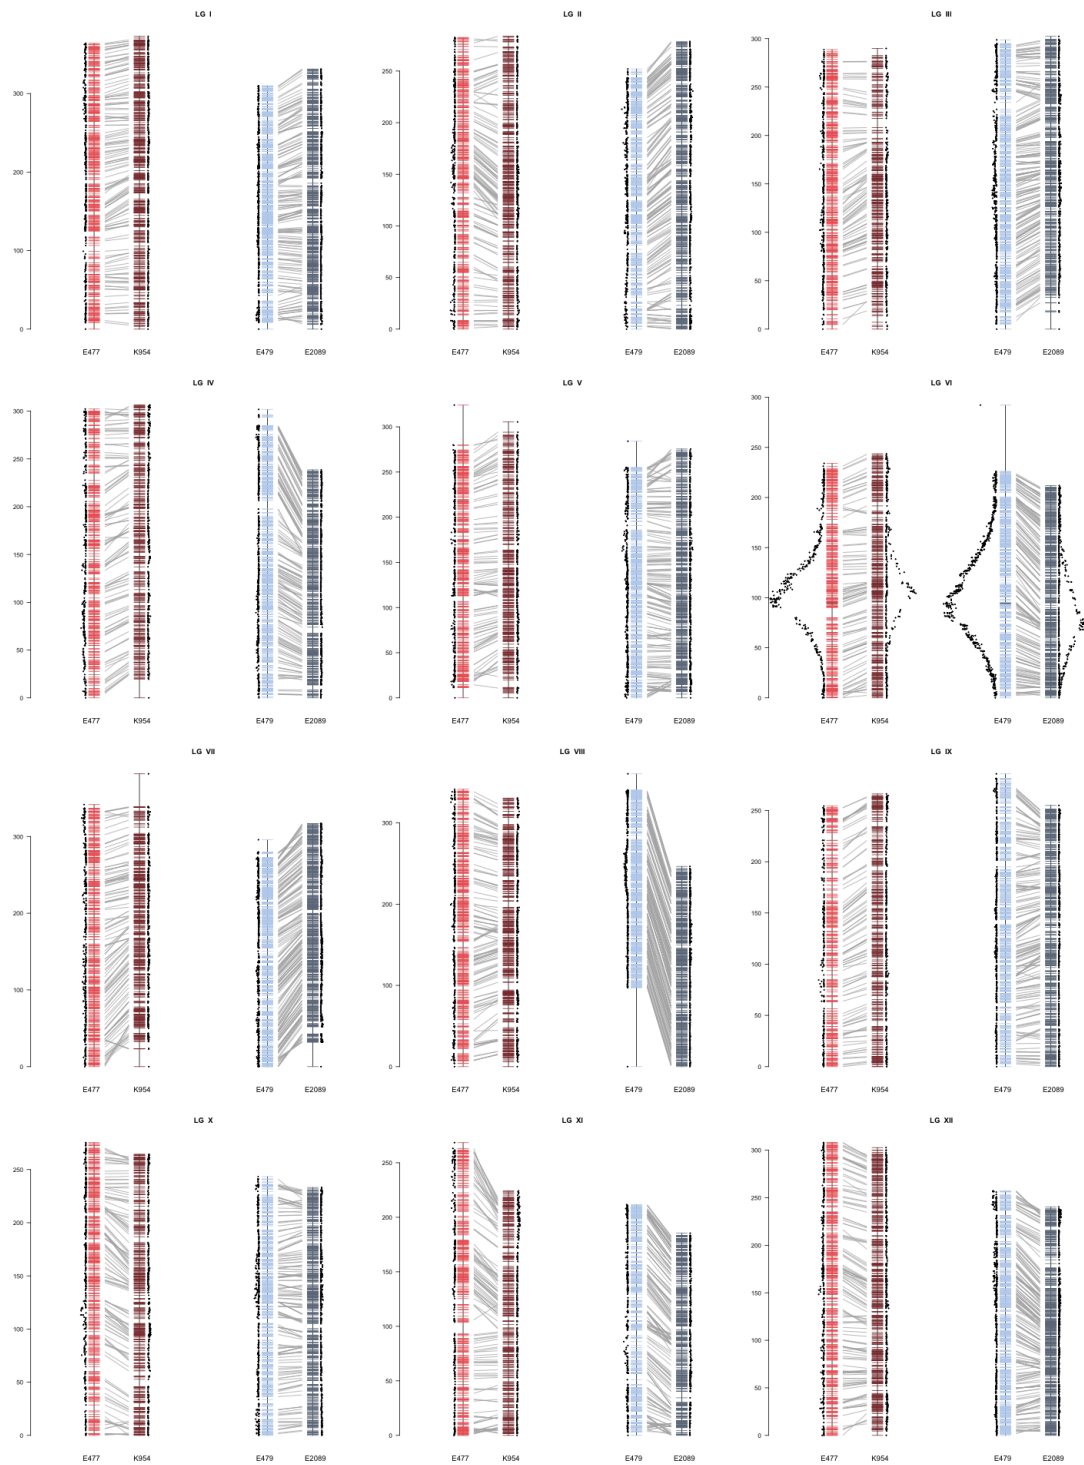

Figure 3: Alignment of the haploid Linkage groups (LG) and significance of the associations between marker genotypes and the Pendula phenotype.



**Table 2:** All probe markers positioned within a 5 cM distance from the pendula marker on LGVI for E477 (first) and E479 (second). Marker: name of the probe-marker; Marker position (cM): position on the genetic map; Marker association (segr. Type): chi-square p-value for the association between the probe-marker and the pendula phenotype, segregation type of the probe-marker within brackets; Scaffold: Which scaffold the probe-marker comes from; Scaffold position (bp): Position on the scaffold in bp for which SNP that represents the probe-marker; Gene model: Which gene model the probe-marker belongs to; Arabidopsis ortholog: orthologous gene family in Arabidopsis. Bold names represent markers with the SNP located at the same position in the marker

| Marker             | Marker position (cM) | Marker association (segr. type)      | Scaffold position (bp)     | Gene model and scaffold | Arabidopsis ortholog | Arabidopsis description (synonyms)                      |
|--------------------|----------------------|--------------------------------------|----------------------------|-------------------------|----------------------|---------------------------------------------------------|
| <b>MA_312116:1</b> | 197.944<br>138.588   | 7.17e-30 (B3.7)<br>1.14e-31 (B3.7)   | <b>3858</b><br><b>3858</b> | MA_312116g0010          | AT2G20690            | lumazine-binding family protein                         |
| Pendula (E477)     | 197.944              | -                                    | -                          | -                       | -                    | -                                                       |
| MA_10429386:1      | 198.424<br>137.999   | 7.85e-59 (D1.10)<br>1.77e-50 (D1.10) | 1485<br>1476               | MA_10429386g0010        | AT1G50500            | Membrane trafficking VPS53 family protein (VPS53, HIT1) |
| MA_16252:1         | 198.424<br>137.358   | 1.12e-56 (D1.10)<br>1.66e-50 (D1.10) | 38240<br>38305             | MA_16252g0010           | -                    | -                                                       |
| MA_34514:1         | 198.424<br>137.999   | 1.60e-58 (D1.10)<br>4.23e-54 (D1.10) | 2866<br>2923               | MA_34514g0010           | AT1G50500            | Membrane trafficking VPS53 family protein (VPS53, HIT1) |

|                      |                    |                                      |                              |                  |           |                                                                  |
|----------------------|--------------------|--------------------------------------|------------------------------|------------------|-----------|------------------------------------------------------------------|
| MA_19222:2           | 198.933<br>138.985 | 9.30e-52 (D1.10)<br>1.50e-50 (D1.10) | 1915<br>1856                 | MA_19222g0010    | AT5G13650 | Suppressor of variegation 3 (SVR3)                               |
| MA_45621:1           | 199.211<br>138.985 | 9.73e-26 (B3.7)<br>8.09e-52 (D1.10)  | 6130<br>6144                 | MA_45621g0010    | AT5G23750 | Remorin family protein                                           |
| Pendula (E479)       | 139.811            | -                                    | -                            | -                | -         | -                                                                |
| <b>MA_10426685:1</b> | 200.028<br>141.648 | 3.82e-27 (B3.7)<br>1.53e-53 (D1.10)  | <b>1595</b><br><b>1595</b>   | MA_10426685g0010 | AT1G74240 | Mitochondrial substrate carrier family protein                   |
| <b>MA_51707:1</b>    | 200.618<br>143.118 | 1.72e-57 (D1.10)<br>2.37e-53 (D1.10) | <b>30163</b><br><b>30163</b> | MA_51707g0010    | AT4G04350 | tRNA synthetase class I (I, L, M and V) family protein (EMB2369) |
| <b>MA_881406:1</b>   | 200.618<br>143.118 | 3.57e-58 (D1.10)<br>1.44e-50 (D1.10) | <b>7579</b><br><b>7579</b>   | MA_881406g0010   | AT1G10380 | Putative membrane lipoprotein                                    |
| MA_5480022:1         | 200.618<br>143.118 | 1.57e-57 (D1.10)<br>1.66e-25 (B3.7)  | 1587<br>1582                 | MA_5480022g0010  | AT2G47730 | Glutathione S-transferase                                        |
| <b>MA_335371:1</b>   | 200.795<br>143.393 | 1.01e-55 (D1.10)<br>1.79e-53 (D1.10) | <b>3883</b><br><b>3883</b>   | MA_335371g0010   | AT1G04960 | Protein of unknown function (DUF1664)                            |
| MA_873234:1          | 202.325<br>142.561 | 6.64e-56 (D1.10)<br>1.66e-49 (D1.10) | 1588<br>1597                 | MA_873234g0010   | AT1G48320 | Thioesterase superfamily protein                                 |
